# Supplementary material for: Red light-transmittance bagging promotes carotenoid accumulation of grapefruit during ripening
Source: PubMed Central journal article supplement (PMC8980019; doi:10.1038/s42003-022-03270-7), 2022-04-04
Supplement: 42003_2022_3270_MOESM2_ESM.pdf [file 42003_2022_3270_MOESM2_ESM.pdf]

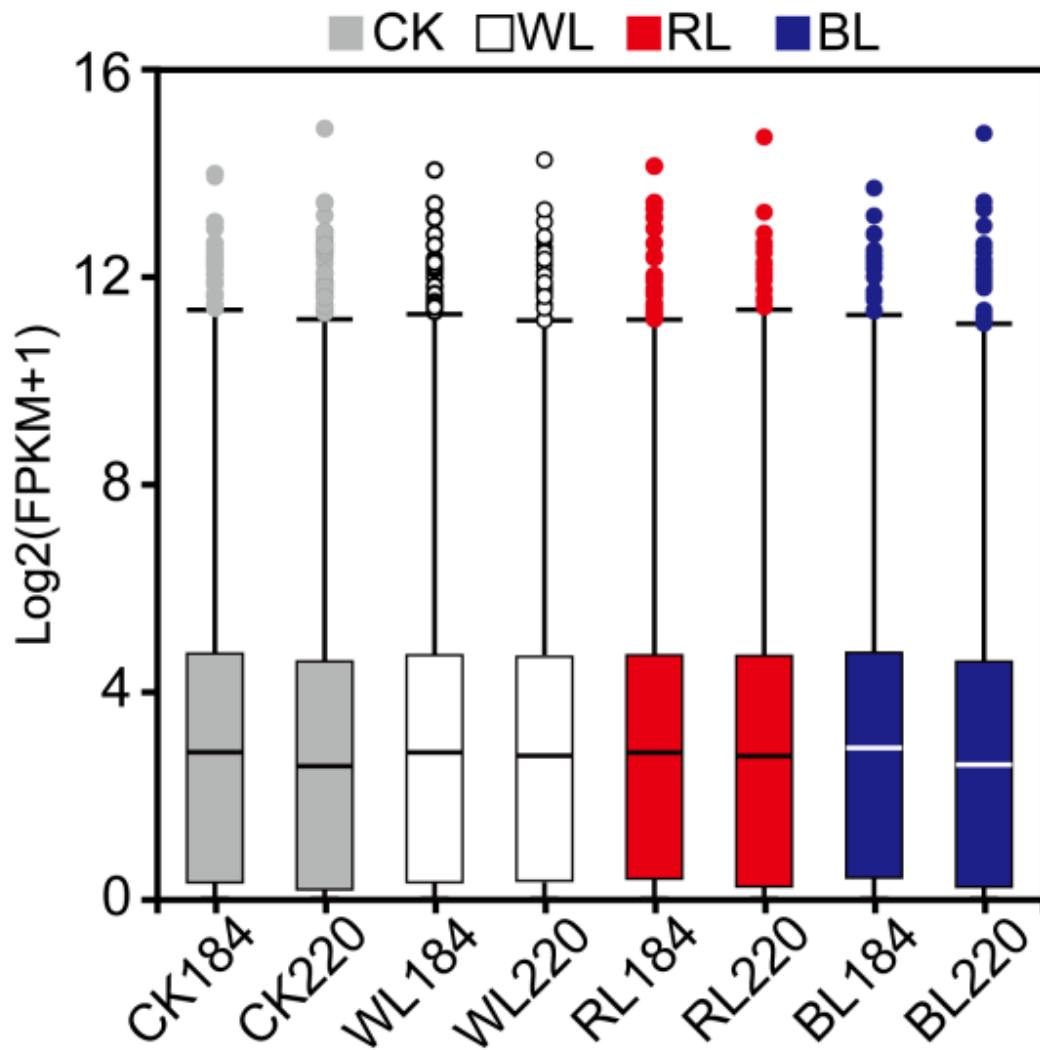

**Supplementary Figure 1.** Box-plot representation of distribution of gene expression level for RNA-seq during grapefruit ripening. RPKM, Reads Per Kilobase transcriptome per Million mapped reads; CK: control group; WL: white light treatment; RL: red light treatment; BL: blue light treatment; DAB184 and 220 represent 184 and 220 days after blossom, respectively. The grey, white, red and blue Box-plots represent the samples treated with control, white light, red light and blue light, respectively.

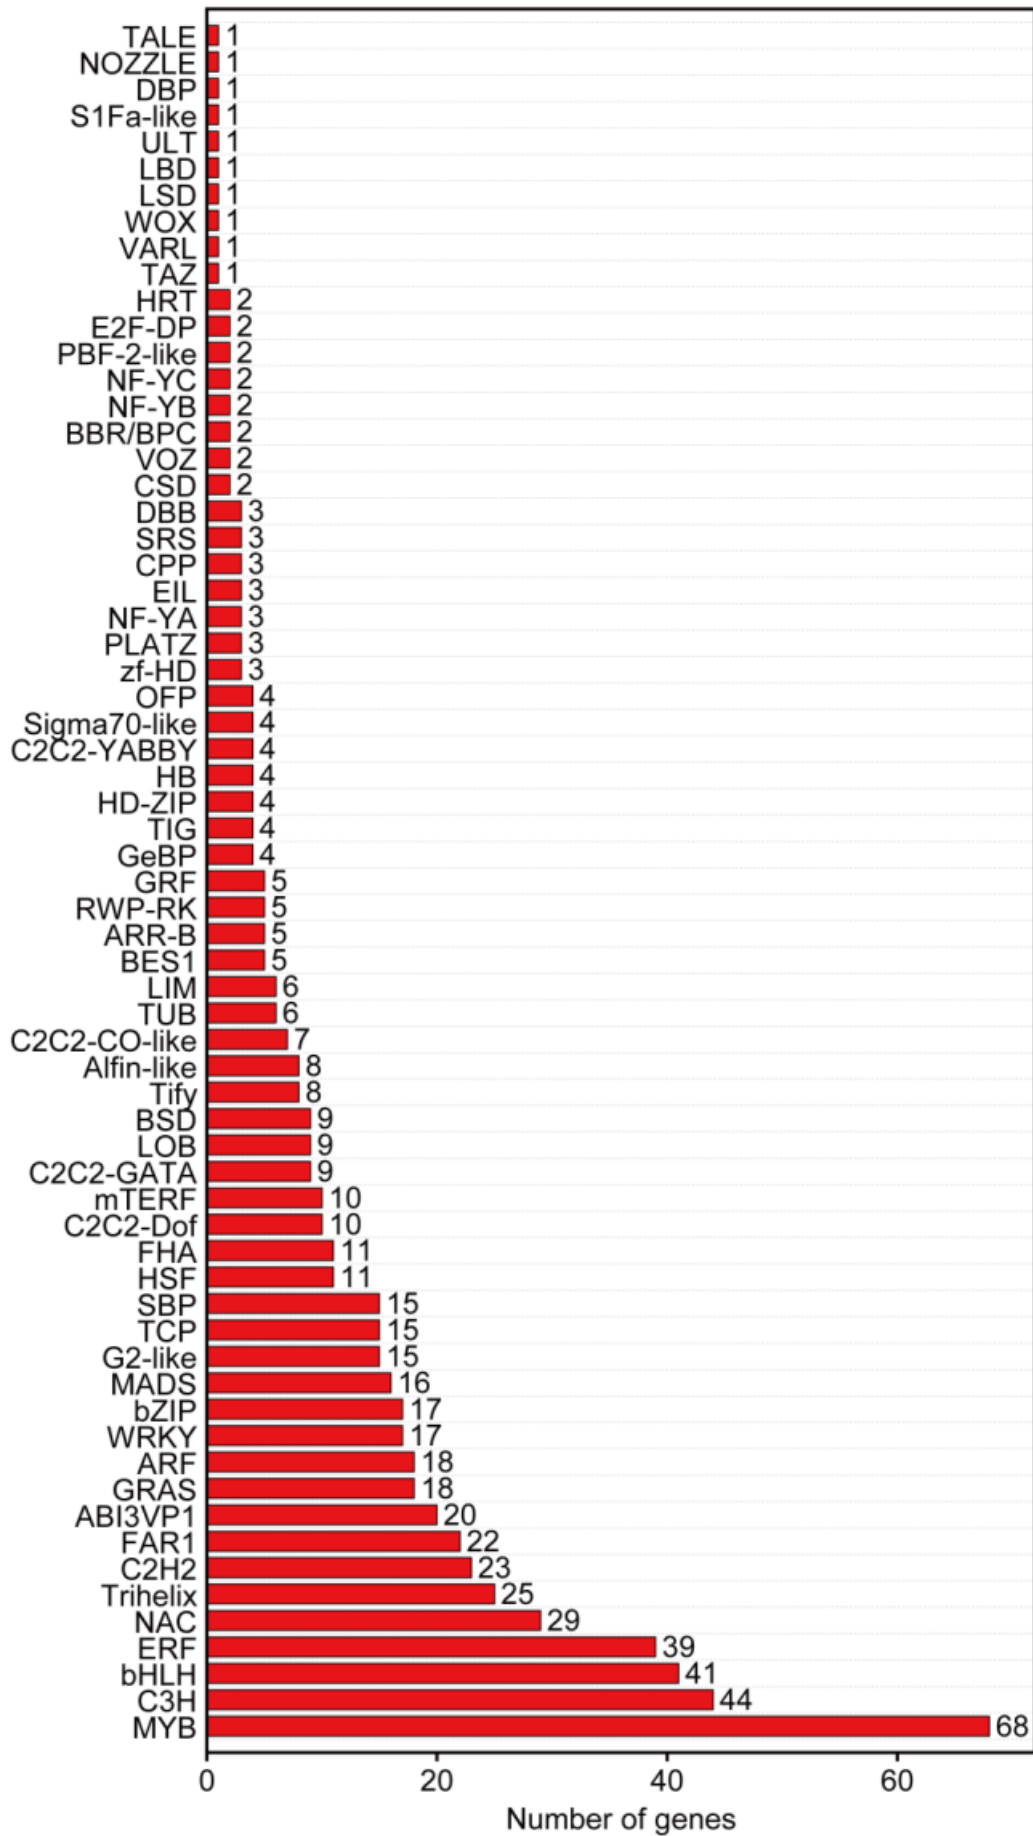

**Supplementary Figure 2.** Enrichment analysis of TFs in carotenoid co-expression modules.

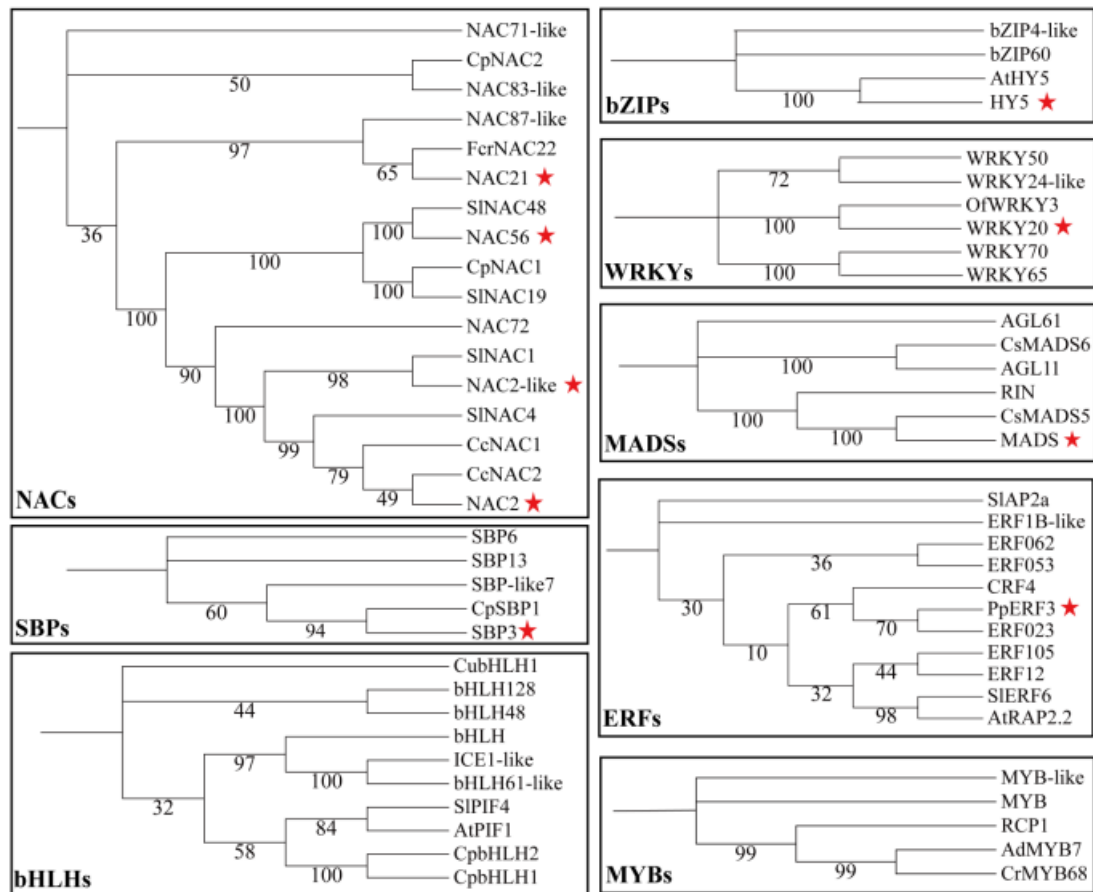

**Supplementary Figure 3.** Phylogenetic analysis of candidate NACs, SBPs, bHLHs, bZIPs, WRKYs, MADSs, ERFs and MYBs transcription factor. Accession number for transcription factors in phylogenetic tree were listed in **Supplementary Table 6**.

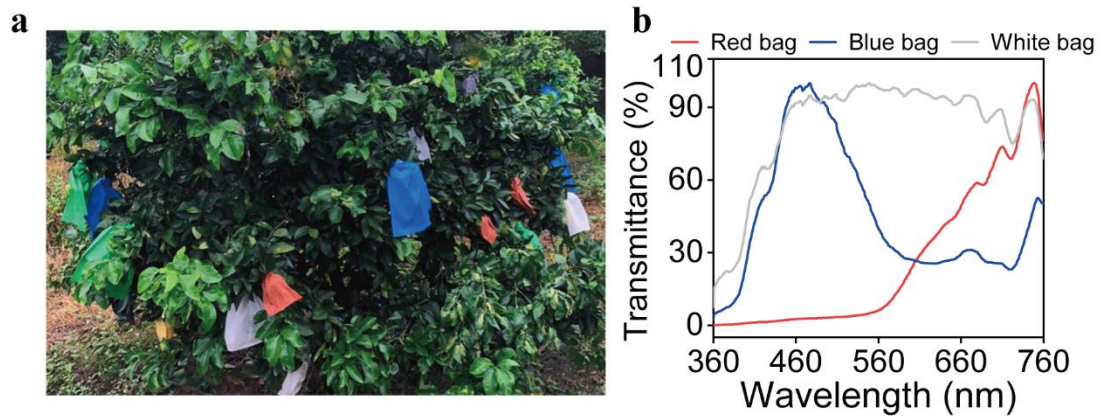

**c**

|                                                             | CK                | WL                | RL                | BL                |
|-------------------------------------------------------------|-------------------|-------------------|-------------------|-------------------|
| Light intensity<br>( $\mu\text{mol m}^{-2} \text{s}^{-1}$ ) | 250.21 $\pm$ 5.35 | 183.72 $\pm$ 3.44 | 145.39 $\pm$ 3.11 | 123.78 $\pm$ 2.16 |
| Temperature<br>( $^{\circ}\text{C}$ )                       | 19.61 $\pm$ 0.58  | 20.37 $\pm$ 0.74  | 20.63 $\pm$ 0.56  | 20.6 $\pm$ 0.41   |
| Relative humidity<br>(%)                                    | 55.67 $\pm$ 2.11  | 53.57 $\pm$ 1.94  | 55.63 $\pm$ 1.87  | 54.97 $\pm$ 1.69  |
| CO <sub>2</sub> concentration<br>(%)                        | 0.20 $\pm$ 0.03   | 0.23 $\pm$ 0.04   | 0.22 $\pm$ 0.03   | 0.23 $\pm$ 0.04   |
| O <sub>2</sub> concentration<br>(%)                         | 20.10 $\pm$ 1.01  | 20.21 $\pm$ 0.86  | 20.20 $\pm$ 0.74  | 20.21 $\pm$ 0.62  |

**Supplementary Figure 4.** Grapefruit-bagging treatment in the field. **a** Grapefruit bagged with light-transmitting bags in the field. **b** Light-transmitting property of bags used for bagging. **c** The micro-climate condition of different light-transmitting bags. Data are expressed as means  $\pm$  standard deviation of triplicate samples ( $n = 3$ ). CK: control group; WL: white-light treatment; RL: red-light treatment; BL: blue-light treatment. All parameters were measured at 10:00 AM in October 20, 2020 (a sunny day).

**Supplementary Table 1.** Retention time and maximum absorption peaks of carotenoids standards.

| NO. | Carotenoids        | Rt (min) | $\lambda_{\max}$ (nm) observed |         |          | $\lambda_{\max}$ (nm) literature <sup>a</sup> |         |          |
|-----|--------------------|----------|--------------------------------|---------|----------|-----------------------------------------------|---------|----------|
|     |                    |          | Peak I                         | Peak II | Peak III | Peak I                                        | Peak II | Peak III |
| 1   | 9-cis-violaxanthin | 18.15    | 412                            | 436     | 462.7    | 411                                           | 434     | 463      |
| 2   | phytofluene        | 32.41    | 329                            | 347.1   | 364      | 331                                           | 347     | 364      |
| 3   | $\zeta$ -carotene  | 39.53    | 380                            | 398.5   | 422.7    | 380                                           | 400     | 426      |
| 4   | $\beta$ -carotene  | 46.62    | 426                            | 451.8   | 478.5    | 426                                           | 451     | 473      |
| 5   | lycopene           | 49.00    | 446.9                          | 474.8   | /        | 446                                           | 473     | 503      |

<sup>a</sup>Characterization of Pinalate, a novel *Citrus sinensis* mutant with a fruit-specific alteration that results in yellow pigmentation and decreased ABA content.

**Supplementary Table 2.** Total RNA quality of RNA-seq samples during grapefruit ripening.

| Sample  | Concentration(ng/ $\mu$ L) | Volume( $\mu$ L) | Total content( $\mu$ g) | RIN/RQN | 28S/18S | Results |
|---------|----------------------------|------------------|-------------------------|---------|---------|---------|
| CK184_1 | 645                        | 30               | 19.35                   | 9.1     | 1.3     | A       |
| CK184_2 | 470                        | 30               | 14.1                    | 8.9     | 1.2     | A       |
| CK184_3 | 305                        | 30               | 9.15                    | 9.2     | 1.3     | A       |
| CK220_1 | 420                        | 30               | 12.6                    | 8.6     | 1.1     | A       |
| CK220_2 | 520                        | 30               | 15.6                    | 8.6     | 1.2     | A       |
| CK220_3 | 347                        | 30               | 10.41                   | 8.4     | 1.2     | A       |
| WL184_1 | 233                        | 30               | 6.99                    | 8.4     | 1.2     | A       |
| WL184_2 | 219                        | 30               | 6.57                    | 8.4     | 1.1     | A       |
| WL184_3 | 440                        | 30               | 13.2                    | 8       | 1.2     | A       |
| WL220_1 | 350                        | 30               | 10.5                    | 8.5     | 1.3     | A       |
| WL220_2 | 505                        | 30               | 15.15                   | 8.8     | 1.3     | A       |
| WL220_3 | 365                        | 30               | 10.95                   | 8.7     | 1.4     | A       |
| RL184_1 | 620                        | 30               | 18.6                    | 8.9     | 1.2     | A       |
| RL184_2 | 735                        | 30               | 22.05                   | 9       | 1.3     | A       |
| RL184_3 | 500                        | 30               | 15                      | 9       | 1.5     | A       |
| RL220_1 | 219                        | 30               | 6.57                    | 7.8     | 1       | A       |

|         |     |    |       |     |     |   |
|---------|-----|----|-------|-----|-----|---|
| RL220_2 | 310 | 30 | 9.3   | 8.4 | 1.1 | A |
| RL220_3 | 156 | 30 | 4.68  | 8.4 | 1   | A |
| BL184_1 | 545 | 30 | 16.35 | 8.7 | 1.2 | A |
| BL184_2 | 640 | 30 | 19.2  | 8.2 | 1.2 | A |
| BL184_3 | 600 | 30 | 18    | 9.2 | 1.1 | A |
| BL220_1 | 320 | 30 | 9.6   | 8.3 | 1   | A |
| BL220_2 | 290 | 30 | 8.7   | 8.6 | 1.1 | A |
| BL220_3 | 480 | 30 | 14.4  | 8.5 | 1.1 | A |

Note: CK: control group; WL: white light treatment; RL: red light treatment; BL: blue light treatment; 184, 220 represent 184, 220 days after blossom, respectively. "A" refers to the samples which quality meet the requirements of library construction and sequencing.

**Supplementary Table 3.** Throughput and quality of RNA-Seq data in grapefruit fruit.

| Sample  | Total Raw | Total Clean | Total Clean | Clean Reads | Clean Reads | Clean Reads |
|---------|-----------|-------------|-------------|-------------|-------------|-------------|
|         | Reads (M) | Reads (M)   | Bases (Gb)  | Q20 (%)     | Q30 (%)     | Ratio (%)   |
| CK184_1 | 48.93     | 43.94       | 6.59        | 96.88       | 90.8        | 89.79       |
| CK184_2 | 48.93     | 45.43       | 6.81        | 97.01       | 91.14       | 92.83       |
| CK184_3 | 48.93     | 45.27       | 6.79        | 96.82       | 90.62       | 92.52       |
| CK220_1 | 48.93     | 45.12       | 6.77        | 96.95       | 90.98       | 92.21       |
| CK220_2 | 48.93     | 44.3        | 6.65        | 96.96       | 91          | 90.54       |
| CK220_3 | 48.93     | 44.88       | 6.73        | 96.97       | 91.02       | 91.71       |
| WL184_1 | 48.93     | 45.28       | 6.79        | 96.76       | 90.44       | 92.54       |
| WL184_2 | 48.93     | 45.29       | 6.79        | 96.88       | 90.78       | 92.56       |
| WL184_3 | 48.93     | 44.97       | 6.75        | 96.89       | 90.81       | 91.9        |
| WL220_1 | 48.93     | 45.46       | 6.82        | 96.82       | 90.63       | 92.9        |
| WL220_2 | 48.93     | 44.92       | 6.74        | 96.87       | 90.76       | 91.79       |
| WL220_3 | 48.96     | 42.58       | 6.39        | 96.72       | 90.21       | 86.98       |
| RL184_1 | 50.68     | 45.07       | 6.76        | 97.03       | 91.13       | 88.93       |
| RL184_2 | 50.68     | 44.29       | 6.64        | 96.98       | 90.98       | 87.38       |
| RL184_3 | 50.68     | 44.97       | 6.75        | 96.6        | 89.91       | 88.74       |
| RL220_1 | 50.68     | 44.09       | 6.61        | 96.66       | 90.08       | 87          |

|         |       |       |      |       |       |       |
|---------|-------|-------|------|-------|-------|-------|
| RL220_2 | 50.14 | 43.09 | 6.46 | 96.72 | 90.21 | 85.95 |
| RL220_3 | 50.64 | 43.99 | 6.6  | 96.45 | 89.46 | 86.87 |
| BL184_1 | 50.68 | 44.8  | 6.72 | 96.88 | 90.67 | 88.39 |
| BL184_2 | 47.19 | 44.65 | 6.7  | 96.65 | 90.04 | 94.62 |
| BL184_3 | 47.19 | 44.45 | 6.67 | 96.59 | 89.86 | 94.21 |
| BL220_1 | 47.19 | 44.92 | 6.74 | 96.62 | 89.97 | 95.19 |
| BL220_2 | 47.19 | 44.93 | 6.74 | 96.48 | 89.59 | 95.21 |
| BL220_3 | 47.19 | 44.67 | 6.7  | 96.62 | 89.95 | 94.68 |

Note: CK: control group; WL: white light treatment; RL: red light treatment; BL: blue light treatment; 184, 220 represent 184, 220 days after blossom, respectively. Q20: the rate of bases which quality is greater than 20; Q30: the rate of bases which quality is greater than 30.

**Supplementary Table 4.** Summary of reference genome and gene sequence mapping of grapefruit during ripening after RNA-seq.

| Sample  | Total       | Reference genome |             | Reference gene sequence |             |
|---------|-------------|------------------|-------------|-------------------------|-------------|
|         | Clean Reads | Total            | Uniquely    | Total                   | Uniquely    |
|         | (M)         | Mapping (%)      | Mapping (%) | Mapping (%)             | Mapping (%) |
| CK184_1 | 43.94       | 86.03            | 82.82       | 75.21                   | 71.41       |
| CK184_2 | 45.43       | 87.19            | 83.86       | 78.7                    | 74.46       |
| CK184_3 | 45.27       | 86.73            | 83.46       | 77.16                   | 73.25       |
| CK220_1 | 45.12       | 87.58            | 83.74       | 77.37                   | 72.91       |
| CK220_2 | 44.3        | 87.15            | 83.35       | 76.64                   | 72.23       |
| CK220_3 | 44.88       | 87.25            | 83.38       | 76.18                   | 71.51       |
| WL184_1 | 45.28       | 86.73            | 83.49       | 76.15                   | 72.36       |
| WL184_2 | 45.29       | 87.29            | 83.99       | 77.11                   | 73.13       |
| WL184_3 | 44.97       | 87.08            | 83.8        | 76.35                   | 72.47       |
| WL220_1 | 45.46       | 85.75            | 82.1        | 76.05                   | 71.8        |
| WL220_2 | 44.92       | 87.21            | 83.5        | 75.71                   | 71.54       |
| WL220_3 | 42.58       | 87.43            | 83.6        | 76.63                   | 72.41       |
| RL184_1 | 45.07       | 86.6             | 83.35       | 76.46                   | 72.61       |
| RL184_2 | 44.29       | 86.04            | 82.87       | 75.08                   | 71.27       |



|         |       |       |       |       |       |
|---------|-------|-------|-------|-------|-------|
| RL184_3 | 44.97 | 86.55 | 83.38 | 76.23 | 72.48 |
| RL220_1 | 44.09 | 86.03 | 82.34 | 75.33 | 71.09 |
| RL220_2 | 43.09 | 86.2  | 82.51 | 75.24 | 71.06 |
| RL220_3 | 43.99 | 86.54 | 82.89 | 75.83 | 71.58 |
| BL184_1 | 44.8  | 86.48 | 83.32 | 75.64 | 71.79 |
| BL184_2 | 44.65 | 87.11 | 83.92 | 77.7  | 73.76 |
| BL184_3 | 44.45 | 86.27 | 83.09 | 75.73 | 71.97 |
| BL220_1 | 44.92 | 87.73 | 84.07 | 77.46 | 73.28 |
| BL220_2 | 44.93 | 86.46 | 82.81 | 76.27 | 72.21 |
| BL220_3 | 44.67 | 87.02 | 83.42 | 76.08 | 71.95 |

Note: CK: control group; WL: white light treatment; RL: red light treatment; BL: blue light treatment; 184, 220 represent 184, 220 days after blossom, respectively.

**Supplementary Table 5.** Expression pattern of differentially expressed genes (DEGs) involved in carotenoid metabolism during grapefruit ripening (from 184 DAB to 220 DAB).

| Gene ID   | module | Gene name | Other ID        | CK184  | WL184 | RL184  | BL184 | log <sub>2</sub> (RL184/CK184) |
|-----------|--------|-----------|-----------------|--------|-------|--------|-------|--------------------------------|
| 102622692 | blue   | ZEP6      | Cs1g04870       | 1.05   | 1.34  | 2.48   | 1.207 | 1.27                           |
| Gene ID   | module | Gene name | Other ID        | CK220  | WL220 | RL220  | BL220 | log <sub>2</sub> (RL220/CK220) |
| 102619293 | -      | ZEP7      | orange1.1t04051 | 0.00   | 0.000 | 0.02   | 0.00  | 2.40                           |
| 102621234 | -      | CCD4-1    | Cs8g14150       | 2.057  | 2.75  | 7.92   | 2.873 | 1.83                           |
| 102578064 | -      | NCED3     | Cs5g14370       | 42.947 | 7.42  | 20.557 | 8.267 | -1.17                          |

Note: CK: control group; WL: white light treatment; RL: red light treatment; BL: blue light treatment; 184 and 220 represents 184, 220 days after blossom, respectively.

**Supplementary Table 6.** Gene ID for protein sequence in phylogenetic tree.

| Gene name | Gene ID      | Gene name | Gene ID        |
|-----------|--------------|-----------|----------------|
| SINAC48   | NM_001279348 | CrMYB68   | KY612511       |
| FcrNAC22  | XM_006440961 | AdMYB7    | AXP34749.1     |
| CpNAC2    | XP_021899904 | RCP1      | KR053165       |
| SINAC4    | KC453999     | CubHLH1   | BAU09296.1     |
| SINAC1    | AY498713     | CpbHLH1   | XP_021890297.1 |

|         |                             |          |                |
|---------|-----------------------------|----------|----------------|
| CcNAC1  | KC814686                    | CpbHLH2  | XP_021907394.1 |
| CcNAC2  | KC814687                    | SIPIF4   | Solyc07g043580 |
| SINAC19 | XM 004236996                | AtPIF1   | At2g20180      |
| CpNAC1  | evm.model.supercontig_1.48  | PpERF3   | Prupe.7G194400 |
| CpSBP1  | evm.model.supercontig_27.40 | AtRAP2.2 | At3g14230      |
| CsMADS6 | MG594037                    | SIAP2a   | SGN-U314860    |
| CsMADS5 | MK431890                    | SIERF6   | JN616265       |
| RIN     | NP_001234670.1              | AtHY5    | AT5G11260      |
| OfWRKY3 | KM504380                    |          |                |

---
